# Supplementary material for: Development and evaluation of the Andhra Pradesh Children and Parent Study Physical Activity Questionnaire (APCAPS-PAQ): a cross-sectional study
Source: Springer Nature journal article supplement (doi:10.1186/s12889-016-2706-9), 2015-12-01
Supplement: MOESM1 [file 9751248]

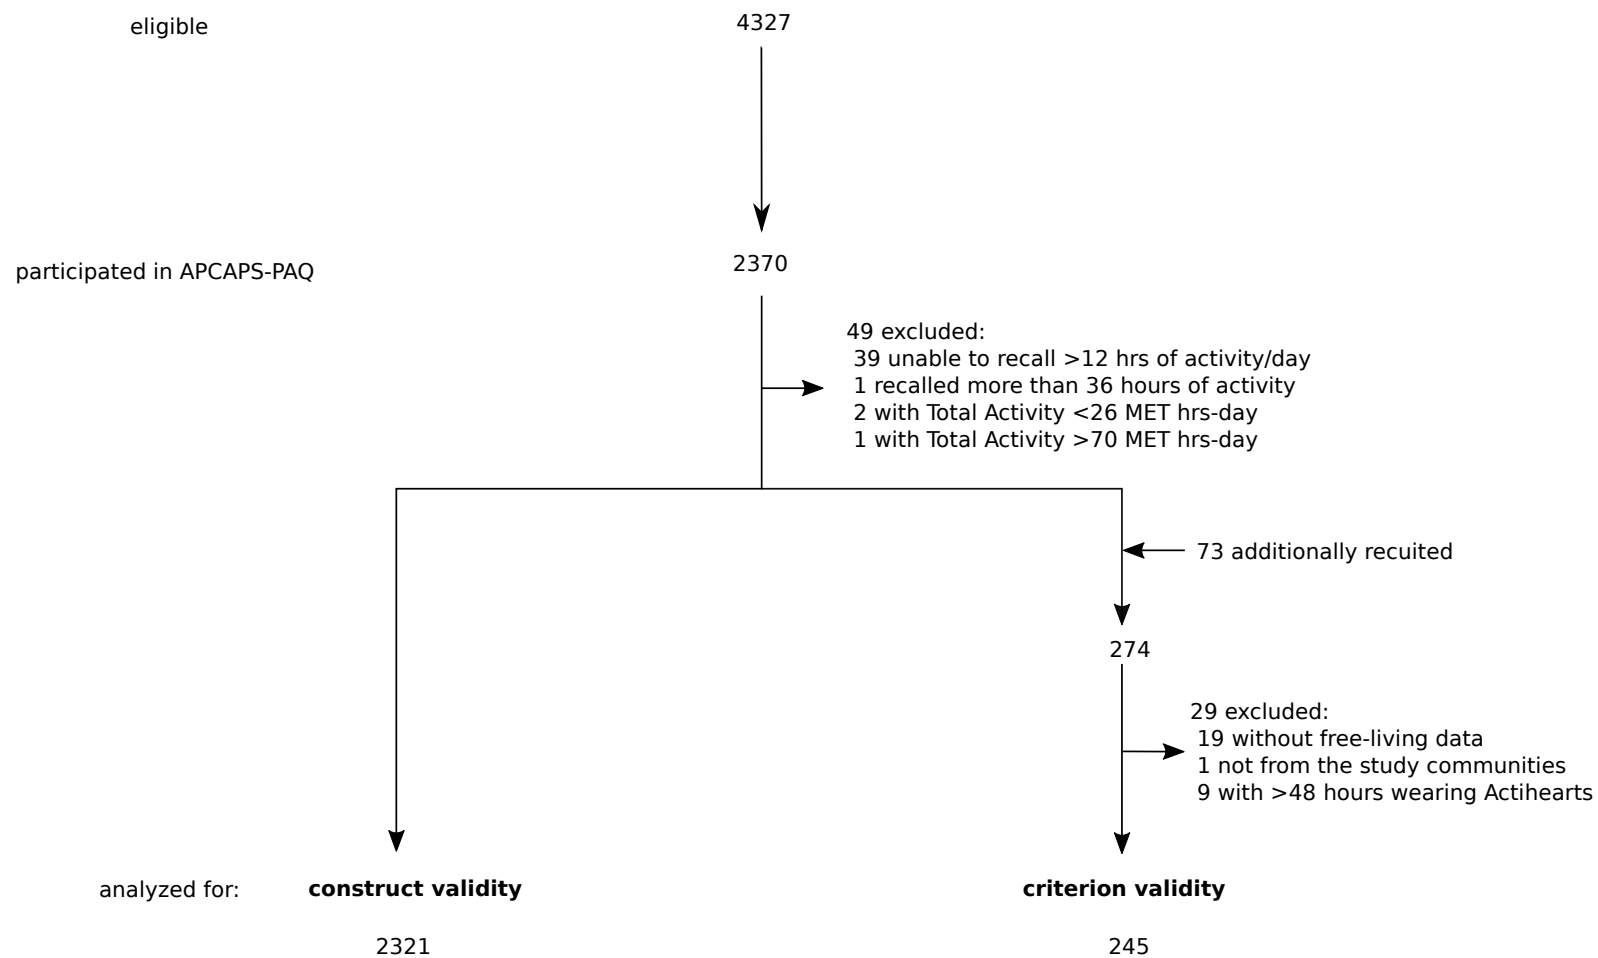

**Supplemental Information S1: A flowchart of recruitment and participation for criterion and construct validity studies for the Andhra Pradesh Children and Parents Study Physical Activity Questionnaire (APCAPS-PAQ) in 2009-2010.**
